# Supplementary material for: Magnetite-sepiolite nanoarchitectonics for improving zein-based bionanocomposite foams
Source: Royal Society of Chemistry journal article supplement (doi:10.1039/d3dt02845c), 2023-01-01
Supplement: d3dt02845c1.pdf [file d3dt02845c1.pdf]

# *Magnetite-sepiolite nanoarchitectonics for improving zein-based bionanocomposite foams*

*Ana C.S. Alcântara, Yorexis González-Alfaro, Margarita Darder, Eduardo Ruiz-Hitzky,  
Pilar Aranda*

## Electronic Supplementary Information

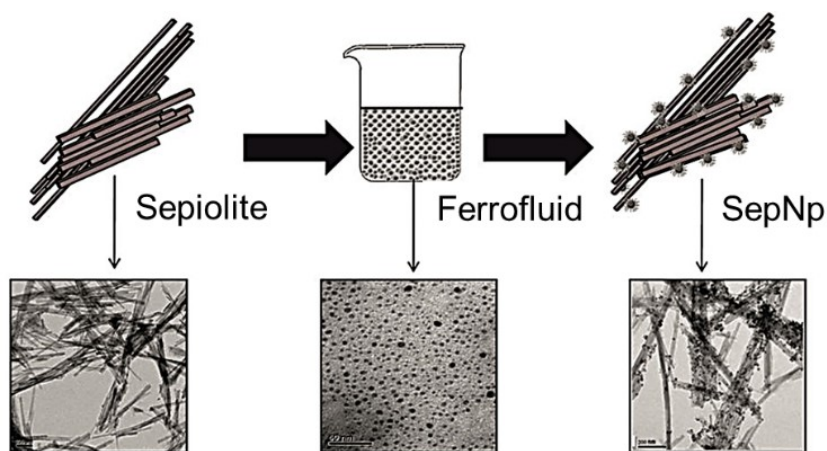

**Fig. S1** Scheme of the general procedure of preparation of the SepNp.

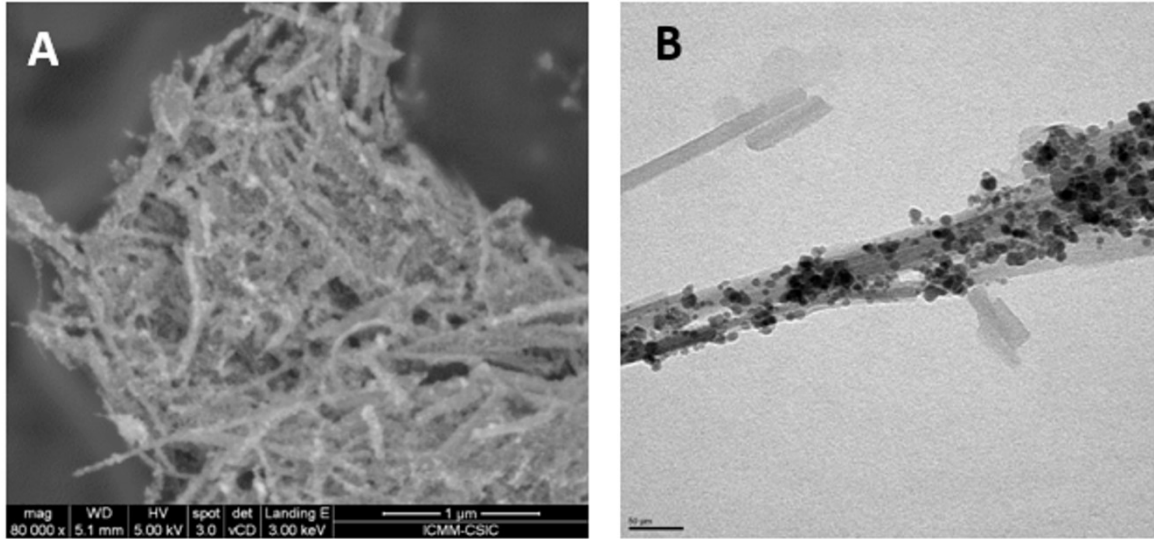

**Fig. S2** Images of the SepNp nanoarchitecture observed by FE-SEM (A) and TEM (B).

Scale in the TEM image corresponds to 50 nm.

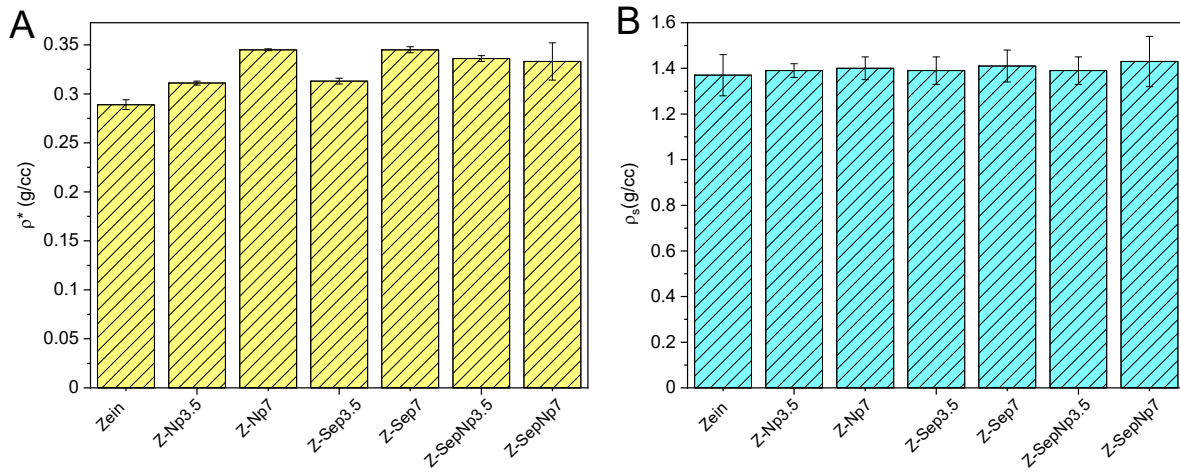

**Fig. S3** (A) Apparent density ( $\rho^*$ ) and (B) true density ( $\rho_s$ ) values as a function of the amount of different fillers in the starting zein pellets.

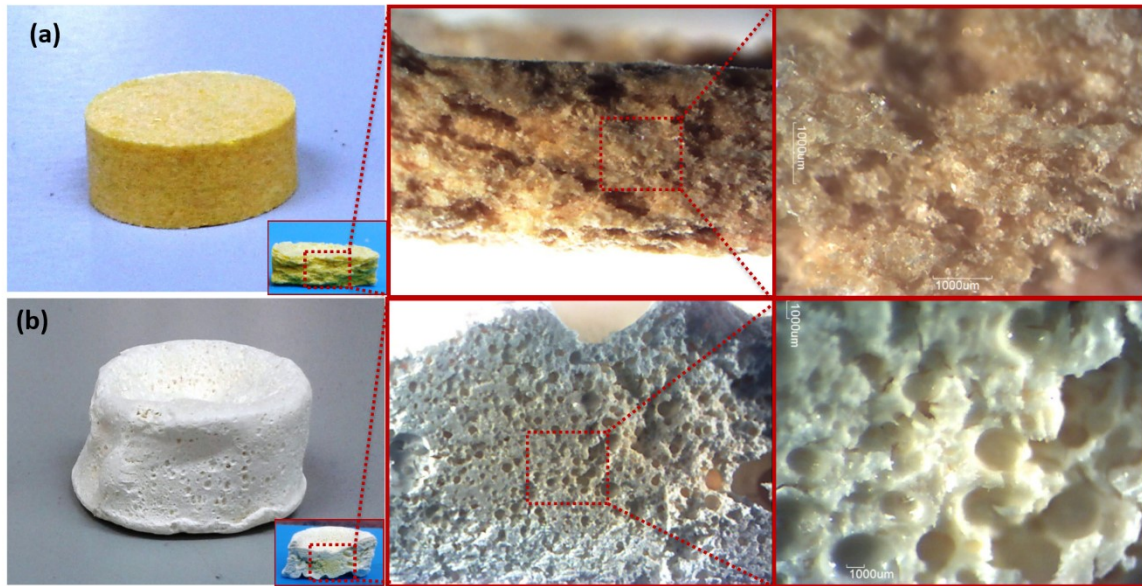

**Fig. S4** Zein pellets (a) before and (b) after the foaming process.

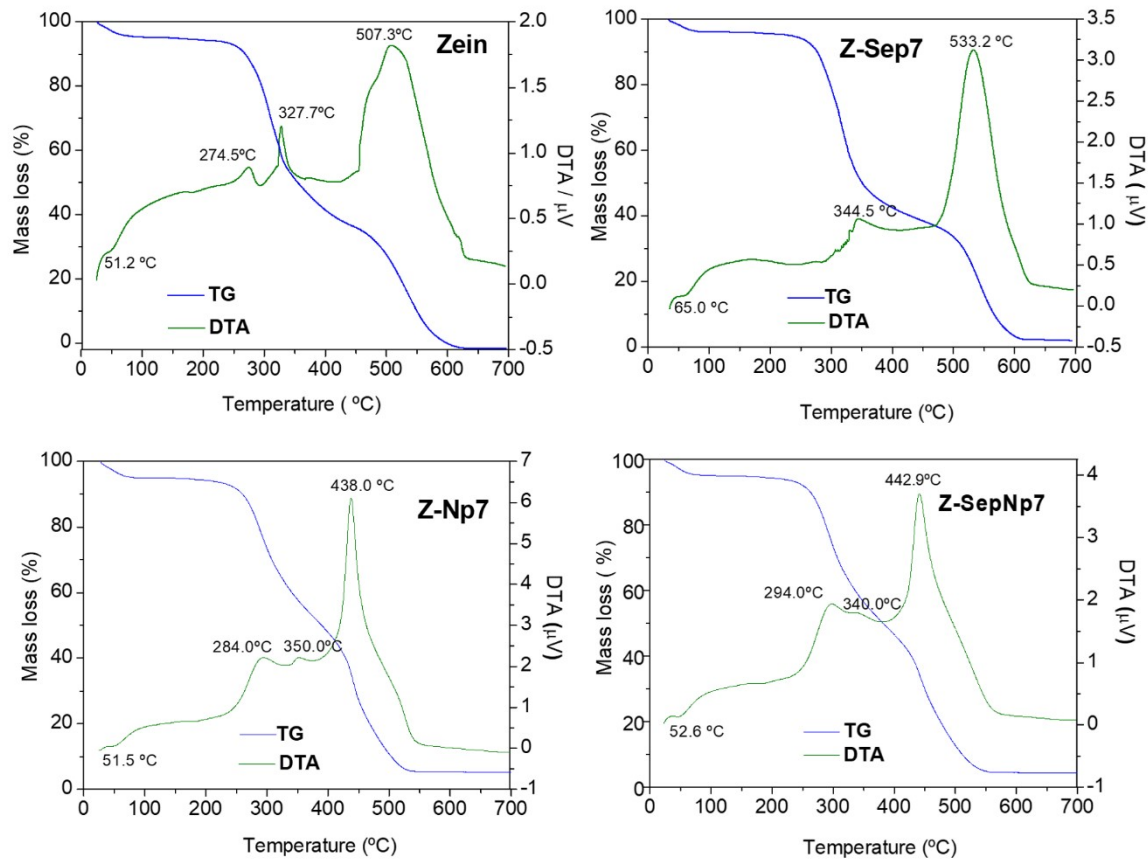

**Fig. S5** TG and DTA curves (under air flow) of foams based on pure zein and zein bionanocomposite foams loaded with 7% of Np, Sep and SepNp.

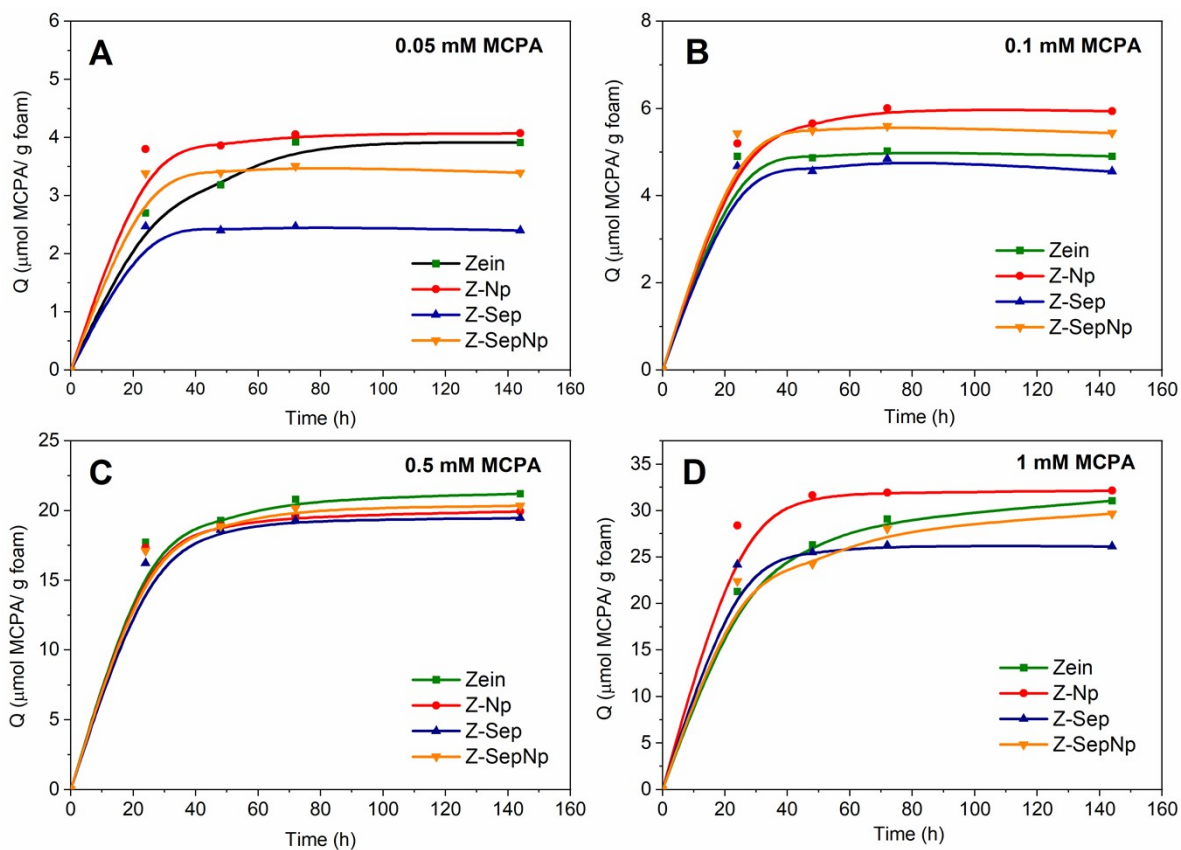

**Fig. S6** Kinetic study of MCPA adsorption of various foams from initial herbicide concentrations of (A) 0.05, (B) 0.1, (C) 0.5 and (D) 1 mmol/L. Experiment performed using 20 mL of MCPA solution and 50 mg of foam.
